# Supplementary material for: Estimated impact of the pneumococcal conjugate vaccine on pneumonia mortality in South Africa, 1999 through 2016: An ecological modelling study
Source: PLOS journal article supplement (doi:10.1371/journal.pmed.1003537), 2021-02-16

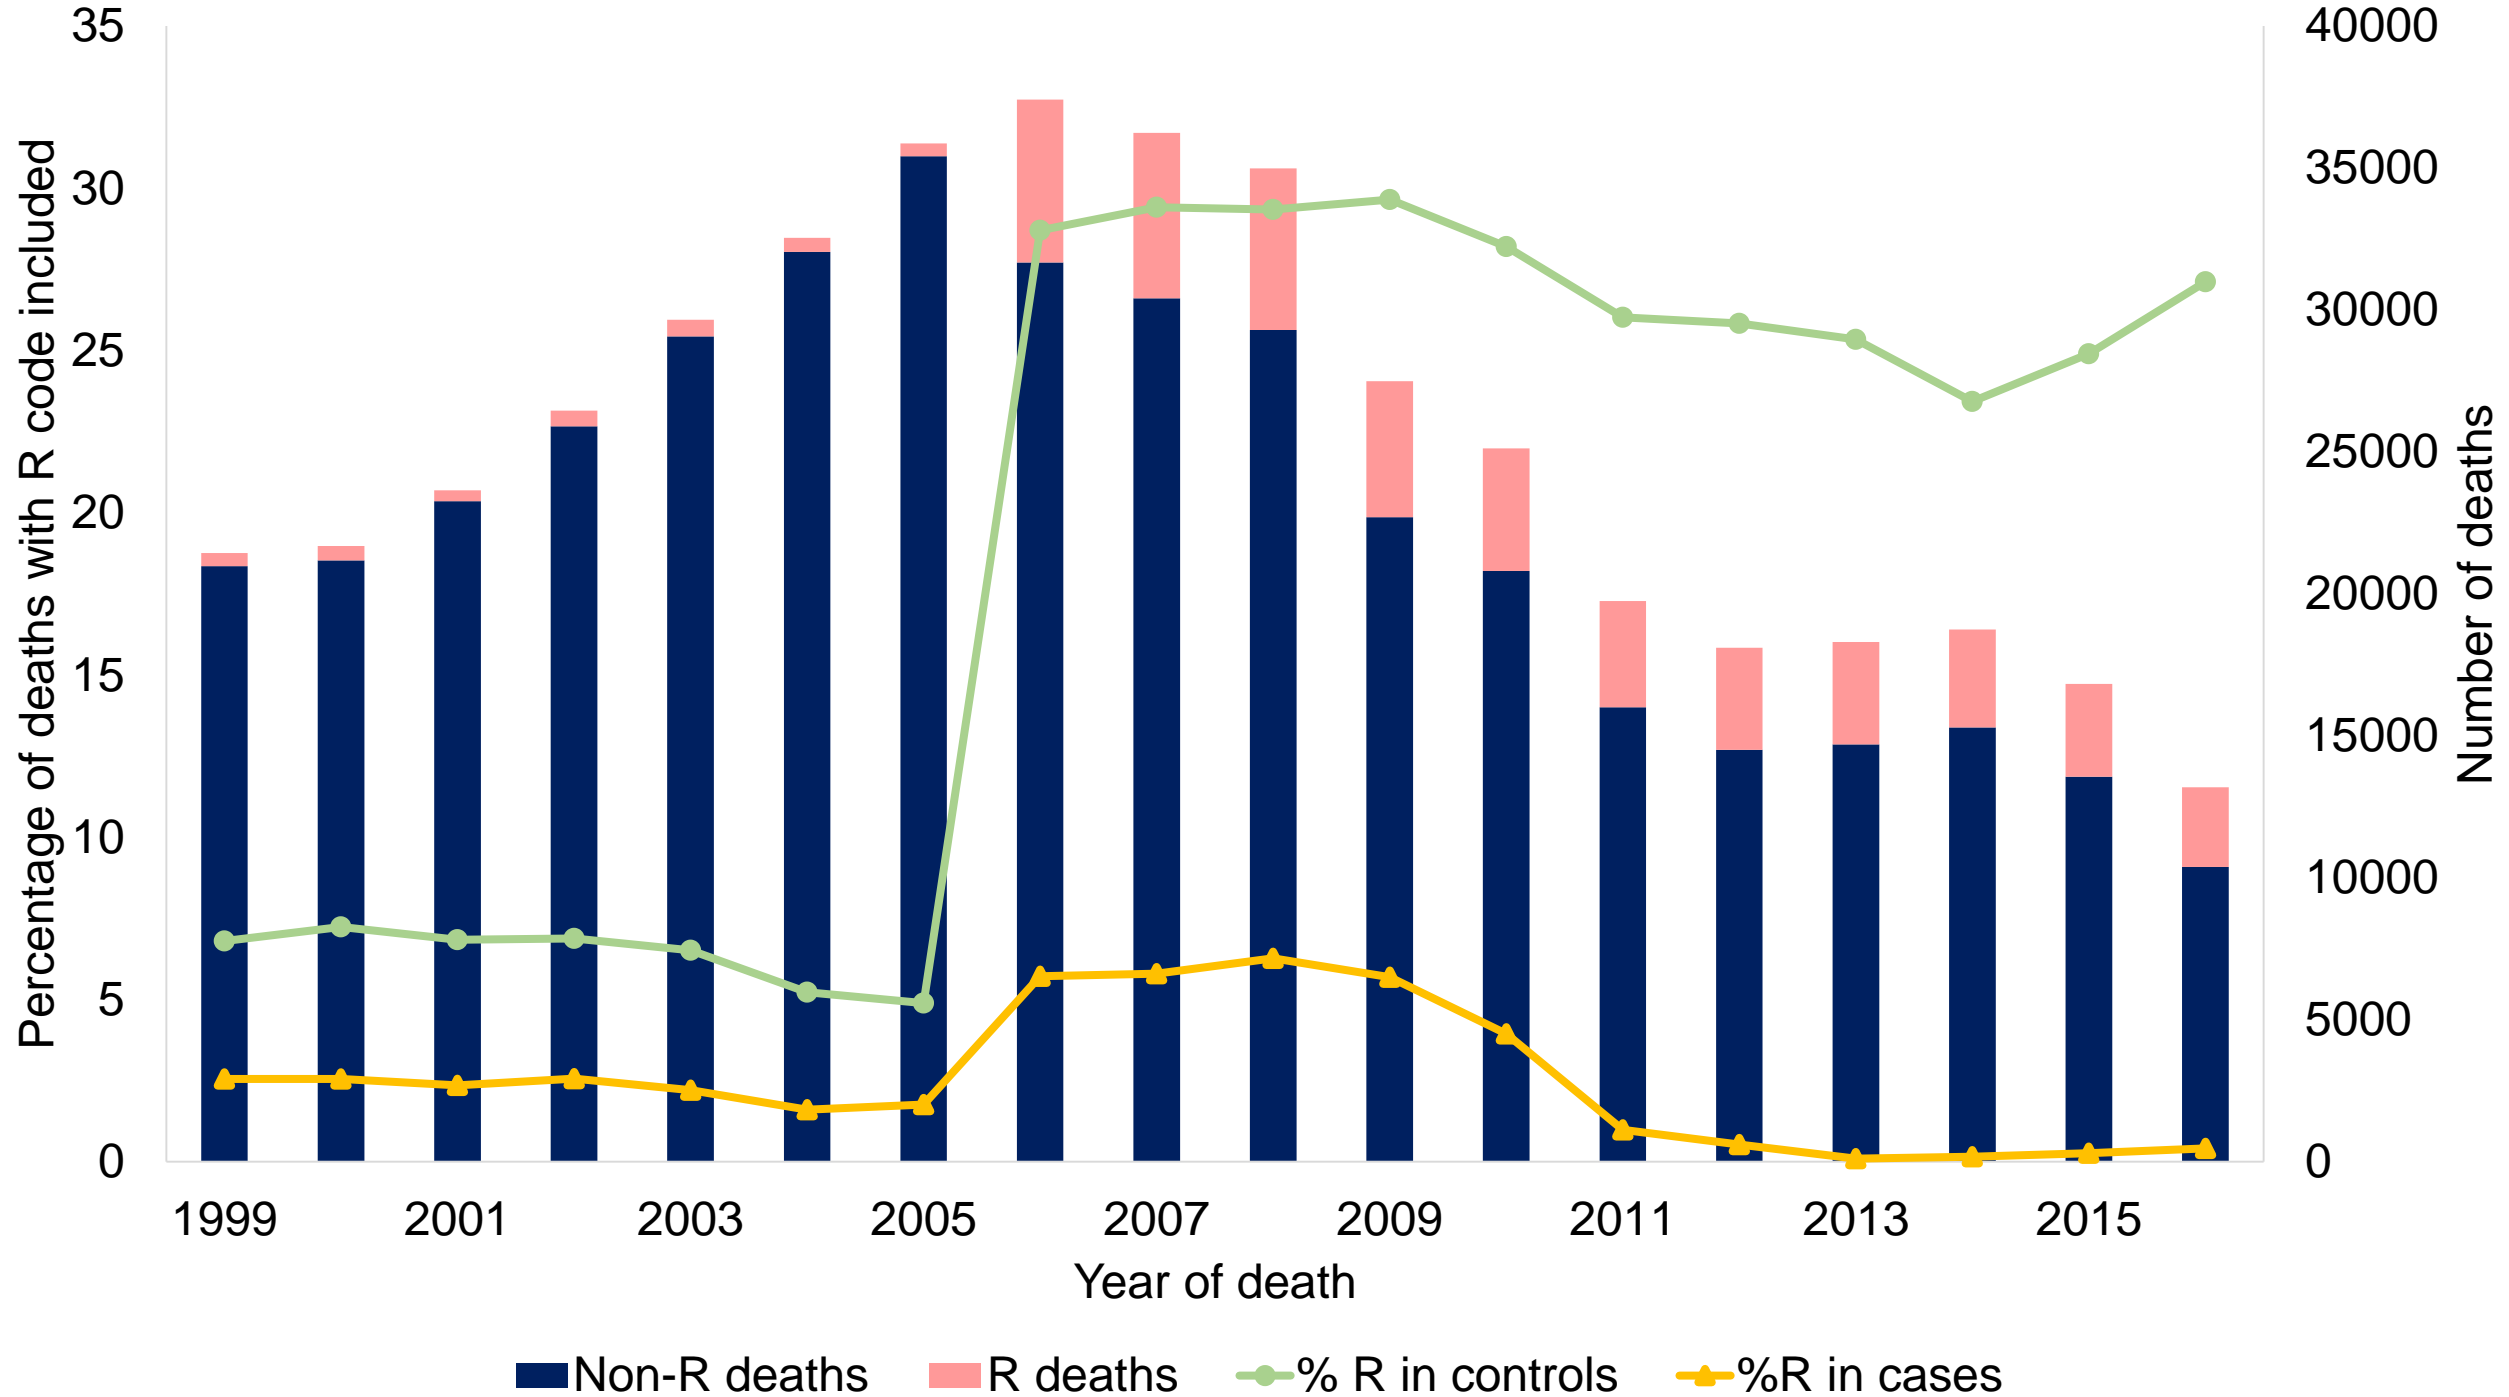

Supplement: S6 (10.1371/journal.pmed.1003537.s006) [file journal.pmed.1003537.s006]
