# Supplementary material for: Estimated impact of the pneumococcal conjugate vaccine on pneumonia mortality in South Africa, 1999 through 2016: An ecological modelling study
Source: PLOS journal article supplement (doi:10.1371/journal.pmed.1003537), 2021-02-16
Supplement: S8 (10.1371/journal.pmed.1003537.s008) [file journal.pmed.1003537.s008]

**S1 Table. Description of ICD codes used for outcome and composite control**

| Outcome group       | Inclusions                                                                                                                                                                                                                                                                                                                                                                                                                                                                                                                                                                                                                                                                                                                                                                                                                                                                                                                                                                                                                                                                                                                                                                                                 | Exclusions                                                                                                                                        |
|---------------------|------------------------------------------------------------------------------------------------------------------------------------------------------------------------------------------------------------------------------------------------------------------------------------------------------------------------------------------------------------------------------------------------------------------------------------------------------------------------------------------------------------------------------------------------------------------------------------------------------------------------------------------------------------------------------------------------------------------------------------------------------------------------------------------------------------------------------------------------------------------------------------------------------------------------------------------------------------------------------------------------------------------------------------------------------------------------------------------------------------------------------------------------------------------------------------------------------------|---------------------------------------------------------------------------------------------------------------------------------------------------|
| All-cause pneumonia | Viral pneumonia, not elsewhere classified (J12)<br>Pneumonia due to <i>Streptococcus pneumoniae</i> (J13)<br>Pneumonia due to <i>Haemophilus influenzae</i> (J14)<br>Bacterial pneumonia, not elsewhere classified (J15)<br>Pneumonia due to other infectious organisms, not elsewhere classified (J16)<br>Pneumonia, organism unspecified (J18)<br>Congenital pneumonia (P23)                                                                                                                                                                                                                                                                                                                                                                                                                                                                                                                                                                                                                                                                                                                                                                                                                             | Not applicable                                                                                                                                    |
| Control groups      | Inclusions                                                                                                                                                                                                                                                                                                                                                                                                                                                                                                                                                                                                                                                                                                                                                                                                                                                                                                                                                                                                                                                                                                                                                                                                 | Exclusions                                                                                                                                        |
| A20_B99_a_D50_D89   | Certain zoonotic bacterial diseases (A20-A28)<br>Infections with a predominantly sexual mode of transmission (A50-A64)<br>Other spirochetal diseases (A65-A69)<br>Other diseases caused by chlamydia (A70-A74)<br>Rickettsioses (A75-A79)<br>Viral infections of the central nervous system (A80-A89)<br>Arthropod-borne viral fevers and viral haemorrhagic fevers (A90-A99)<br>Viral infections characterized by skin and mucous membrane lesions (B00-B09)<br>Viral hepatitis (B15-B19)<br>Human immunodeficiency virus [HIV] disease (B20-B24)<br>Other viral diseases (B25-B34)<br>Mycoses (B35-B49)<br>Protozoal diseases (B50-B64)<br>Helminthiasis (B65-B83)<br>Pediculosis, ascariasis and other infestations (B85-B89)<br>Sequelae of infectious and parasitic diseases (B90-B94)<br>Other infectious diseases (B99)<br>Infections specific to the perinatal period (P35-P39)<br>Nutritional anaemias (D50-D53)<br>Haemolytic anaemias (D55-D59)<br>Aplastic and other anaemias (D60-D64)<br>Coagulation defects, purpura and other hemorrhagic conditions (D65-D69)<br>Other diseases of blood and blood-forming organs (D70-D76)<br>Certain disorders involving the immune mechanism (D80-D89) | Streptococcal septicaemia (A40)<br>Other septicaemia (A41)<br>Bacterial infection of unspecified site (A49)<br>Bacterial sepsis of new-born (P36) |
| A16_A19             | Tuberculosis (A16-A19)                                                                                                                                                                                                                                                                                                                                                                                                                                                                                                                                                                                                                                                                                                                                                                                                                                                                                                                                                                                                                                                                                                                                                                                     | None                                                                                                                                              |
| A20_A48             | Certain zoonotic bacterial diseases (A20-A28)<br>Other bacterial diseases (A30-A49)                                                                                                                                                                                                                                                                                                                                                                                                                                                                                                                                                                                                                                                                                                                                                                                                                                                                                                                                                                                                                                                                                                                        |                                                                                                                                                   |
| A39                 | Meningococcal infection (A39)                                                                                                                                                                                                                                                                                                                                                                                                                                                                                                                                                                                                                                                                                                                                                                                                                                                                                                                                                                                                                                                                                                                                                                              |                                                                                                                                                   |
| A50_A79             | Infections with a predominantly sexual mode of transmission (A50-A64)<br>Other spirochetal diseases (A65-A69)                                                                                                                                                                                                                                                                                                                                                                                                                                                                                                                                                                                                                                                                                                                                                                                                                                                                                                                                                                                                                                                                                              |                                                                                                                                                   |

| Control groups     | Inclusions                                                                                                                                                                                     | Exclusions                                                                                                                                                                                                                                                                                                                                                                         |
|--------------------|------------------------------------------------------------------------------------------------------------------------------------------------------------------------------------------------|------------------------------------------------------------------------------------------------------------------------------------------------------------------------------------------------------------------------------------------------------------------------------------------------------------------------------------------------------------------------------------|
|                    | Other diseases caused by chlamydia (A70-A74)<br>Rickettsioses (A75-A79)                                                                                                                        |                                                                                                                                                                                                                                                                                                                                                                                    |
| A80_B34            | Viral infections of the central nervous system (A80-A89)<br>Arthropod-borne viral fevers and viral hemorrhagic fevers (A90-A99)<br>Viral hepatitis (B15-B19)<br>Other viral diseases (B25-B34) | Measles (B05)<br>Rubella [German measles] (B06)<br>Human immunodeficiency virus [HIV] disease (B20-B24)                                                                                                                                                                                                                                                                            |
| B05_B06            | Measles (B05)<br>Rubella [German measles] (B06)                                                                                                                                                | None                                                                                                                                                                                                                                                                                                                                                                               |
| B20_B24            | Human immunodeficiency virus [HIV] disease (B20-B24)                                                                                                                                           | None                                                                                                                                                                                                                                                                                                                                                                               |
| B35_B49            | Mycoses (B35-B49)                                                                                                                                                                              | None                                                                                                                                                                                                                                                                                                                                                                               |
| B45                | Cryptococcosis (B45)                                                                                                                                                                           | None                                                                                                                                                                                                                                                                                                                                                                               |
| B50_B89            | Protozoal diseases (B50-B64)<br>Helminthiasis (B65-B83)<br>Pediculosis, acariasis and other infestations (B85-B89)                                                                             | None                                                                                                                                                                                                                                                                                                                                                                               |
| B99                | Other and unspecified infectious diseases (B99)                                                                                                                                                | None                                                                                                                                                                                                                                                                                                                                                                               |
| C00_D49            | Neoplasms (C00-D48)                                                                                                                                                                            | None                                                                                                                                                                                                                                                                                                                                                                               |
| E00_E89            | Endocrine, nutritional and metabolic diseases (E00-E88)                                                                                                                                        | None                                                                                                                                                                                                                                                                                                                                                                               |
| E10_E14            | Diabetes mellitus (E10-E14)                                                                                                                                                                    | None                                                                                                                                                                                                                                                                                                                                                                               |
| E40_E46            | Malnutrition (E40-E46)                                                                                                                                                                         | None                                                                                                                                                                                                                                                                                                                                                                               |
| F01_F99            | Mental and behavioural disorders (F01-F99)                                                                                                                                                     | None                                                                                                                                                                                                                                                                                                                                                                               |
| G05_G99            | Diseases of the nervous system (G00-G98)                                                                                                                                                       | Bacterial meningitis, not elsewhere classified (G00)<br>Meningitis due to other and unspecified causes (G03)<br>Encephalitis, myelitis, and encephalomyelitis (G04)<br>Conjunctivitis (H10)<br>Non-suppurative otitis media (H65)<br>Suppurative and unspecified otitis media (H66)<br>Mastoiditis and related conditions (H70)<br>Other disorders of middle ear and mastoid (H74) |
| H00_H99_excl_cj_om | Diseases of the eye and adnexa (H00-H57)                                                                                                                                                       |                                                                                                                                                                                                                                                                                                                                                                                    |
| I00_I99            | Diseases of the circulatory system (I00-I99)                                                                                                                                                   | None                                                                                                                                                                                                                                                                                                                                                                               |
| I60_I64            | Subarachnoid haemorrhage (I60)<br>Intracerebral haemorrhage (I61)<br>Other non-traumatic intracranial haemorrhage (I62)                                                                        | None                                                                                                                                                                                                                                                                                                                                                                               |

| Control groups       | Inclusions                                                                                                                                                                                                                                                                                                                                                                                                                                                                                                                                                                                                                                                                                                                                                                                                                                                                                                      | Exclusions                                                                              |
|----------------------|-----------------------------------------------------------------------------------------------------------------------------------------------------------------------------------------------------------------------------------------------------------------------------------------------------------------------------------------------------------------------------------------------------------------------------------------------------------------------------------------------------------------------------------------------------------------------------------------------------------------------------------------------------------------------------------------------------------------------------------------------------------------------------------------------------------------------------------------------------------------------------------------------------------------|-----------------------------------------------------------------------------------------|
|                      | Cerebral infarction (I63)<br>Stroke, not specified as haemorrhage or infarction (I64)<br>Intracranial non-traumatic haemorrhage of foetus and new-born (P52)                                                                                                                                                                                                                                                                                                                                                                                                                                                                                                                                                                                                                                                                                                                                                    |                                                                                         |
| J00_J99_excl_PI_bron | Diseases of the respiratory system (J00-J98)                                                                                                                                                                                                                                                                                                                                                                                                                                                                                                                                                                                                                                                                                                                                                                                                                                                                    | Influenza and pneumonia (J10-J18)<br>Other acute lower respiratory infections (J20-J22) |
| J20_J22              | Other acute lower respiratory infections (J20-J22)                                                                                                                                                                                                                                                                                                                                                                                                                                                                                                                                                                                                                                                                                                                                                                                                                                                              | None                                                                                    |
| Inf                  | Influenza due to identified influenza virus (J10)                                                                                                                                                                                                                                                                                                                                                                                                                                                                                                                                                                                                                                                                                                                                                                                                                                                               | None                                                                                    |
| K00_K95              | Diseases of the digestive system (K00-K92)                                                                                                                                                                                                                                                                                                                                                                                                                                                                                                                                                                                                                                                                                                                                                                                                                                                                      | None                                                                                    |
| K35                  | Acute appendicitis (K35)                                                                                                                                                                                                                                                                                                                                                                                                                                                                                                                                                                                                                                                                                                                                                                                                                                                                                        | None                                                                                    |
| K80                  | Cholelithiasis (K80)                                                                                                                                                                                                                                                                                                                                                                                                                                                                                                                                                                                                                                                                                                                                                                                                                                                                                            | None                                                                                    |
| L00_L99              | Diseases of the skin and subcutaneous tissue (L00-L98)                                                                                                                                                                                                                                                                                                                                                                                                                                                                                                                                                                                                                                                                                                                                                                                                                                                          | None                                                                                    |
| M00_M99              | Diseases of the musculoskeletal system and connective tissue (M00-M99)                                                                                                                                                                                                                                                                                                                                                                                                                                                                                                                                                                                                                                                                                                                                                                                                                                          | None                                                                                    |
| N00_N99              | Diseases of the genitourinary system (N00-N98)                                                                                                                                                                                                                                                                                                                                                                                                                                                                                                                                                                                                                                                                                                                                                                                                                                                                  | None                                                                                    |
| N39                  | Other disorders of urinary system (N39)                                                                                                                                                                                                                                                                                                                                                                                                                                                                                                                                                                                                                                                                                                                                                                                                                                                                         | None                                                                                    |
| O00_O99              | Pregnancy, childbirth and the puerperium (O00-O99)                                                                                                                                                                                                                                                                                                                                                                                                                                                                                                                                                                                                                                                                                                                                                                                                                                                              | None                                                                                    |
| P00_P15              | New-born affected by maternal factors and by complications of pregnancy, labour and delivery (P00-P04)<br>Disorders related to length of gestation and foetal growth (P05-P08)<br>Birth trauma (P10-P15)                                                                                                                                                                                                                                                                                                                                                                                                                                                                                                                                                                                                                                                                                                        | None                                                                                    |
| P05_P07              | Slow foetal growth and foetal malnutrition (P05)<br>Disorders related to short gestation and low birthweight, not elsewhere classified (P07)                                                                                                                                                                                                                                                                                                                                                                                                                                                                                                                                                                                                                                                                                                                                                                    | None                                                                                    |
| Q00_Q99              | Congenital malformations, deformations and chromosomal abnormalities (Q00-Q99)                                                                                                                                                                                                                                                                                                                                                                                                                                                                                                                                                                                                                                                                                                                                                                                                                                  | None                                                                                    |
| R00_R99              | Symptoms and signs involving the circulatory and respiratory systems (R00-R09)<br>Symptoms and signs involving the digestive system and abdomen (R10-R19)<br>Symptoms and signs involving the skin and subcutaneous tissue (R20-R23)<br>Symptoms and signs involving the nervous and musculoskeletal systems (R25-R29)<br>Symptoms and signs involving the urinary system (R30-R39)<br>Symptoms and signs involving cognition, perception, emotional state and behaviour (R40-R46)<br>Symptoms and signs involving speech and voice (R47-R49)<br>Abnormal findings on examination of blood, without diagnosis (R70-R79)<br>Abnormal findings on examination of urine, without diagnosis (R80-R82)<br>Abnormal findings on examination of other body fluids, substances and tissues, without diagnosis (R83-R89)<br>Abnormal findings on diagnostic imaging and in function studies, without diagnosis (R90-R94) | None                                                                                    |
| S00_T88              | Injury, poisoning and certain other consequences of external causes (S00-T98)                                                                                                                                                                                                                                                                                                                                                                                                                                                                                                                                                                                                                                                                                                                                                                                                                                   | None                                                                                    |
| V01_Y99              | External causes of morbidity and mortality (V01-Y89)                                                                                                                                                                                                                                                                                                                                                                                                                                                                                                                                                                                                                                                                                                                                                                                                                                                            | None                                                                                    |
