# Supplementary material for: Estimated impact of the pneumococcal conjugate vaccine on pneumonia mortality in South Africa, 1999 through 2016: An ecological modelling study
Source: PLOS journal article supplement (doi:10.1371/journal.pmed.1003537), 2021-02-16
Supplement: S15 (10.1371/journal.pmed.1003537.s015) [file journal.pmed.1003537.s015]

**S8 Table. Sensitivity analysis of changes in deaths for all-cause pneumonia mortality (rate ratio) by removing certain years, or aggregating by trimester, in the post-vaccine period (2012-2016), South Africa**

|             | RR Main model              | RR Start 2006              | RR Excl 2009               | RR Excl 2015-2016          | RR Trimester aggregated    |
|-------------|----------------------------|----------------------------|----------------------------|----------------------------|----------------------------|
| 1-11 months | <b>0.67 (0.57 to 0.74)</b> | 1.13 (0.51 to 1.57)        | <b>0.63 (0.50 to 0.71)</b> | <b>0.69 (0.59 to 0.76)</b> | <b>0.69 (0.63 to 0.75)</b> |
| 1-4 years   | <b>0.77 (0.71 to 0.83)</b> | <b>0.69 (0.59 to 0.90)</b> | <b>0.76 (0.68 to 0.82)</b> | <b>0.78 (0.72 to 0.84)</b> | <b>0.72 (0.66 to 0.79)</b> |
| 5-7 years   | <b>0.75 (0.68 to 0.81)</b> | <b>0.74 (0.60 to 0.95)</b> | <b>0.71 (0.65 to 0.79)</b> | <b>0.80 (0.72 to 0.88)</b> | <b>0.74 (0.67 to 0.81)</b> |
| 8-18 years  | <b>0.77 (0.68 to 0.89)</b> | <b>0.69 (0.59 to 0.89)</b> | <b>0.76 (0.66 to 0.89)</b> | <b>0.76 (0.67 to 0.88)</b> | <b>0.76 (0.67 to 0.80)</b> |
| 19-39 years | 0.98 (0.86 to 1.21)        | 0.84 (0.62 to 1.24)        | 0.98 (0.85 to 1.23)        | 0.99 (0.86 to 1.23)        | 0.96 (0.84 to 1.25)        |
| 40-64 years | 1.03 (0.85 to 1.36)        | <b>0.74 (0.64 to 0.90)</b> | 0.89 (0.84 to 1.25)        | 0.98 (0.83 to 1.30)        | 1.03 (0.85 to 1.22)        |
| 65-79 years | 1.07 (0.96 to 1.17)        | 1.02 (0.90 to 1.12)        | 1.07 (0.97 to 1.13)        | 1.04 (0.96 to 1.14)        | 0.99 (0.94 to 1.09)        |
| ≥80 years   | 1.08 (0.96 to 1.15)        | 1.34 (0.86 to 1.46)        | 1.08 (0.95 to 1.15)        | 1.05 (0.95 to 1.12)        | 1.06 (0.92 to 1.13)        |

Rate ratio (RR), 95% credible interval (CrI) in brackets, significant predictions in bold
